# Supplementary material
Source: HighWire-hosted journal article supplement (https://jcp.bmj.com/content/jcp-2021-208000)
Supplement: inline-supplementary-material-7 [file inline-supplementary-material-7.pdf]

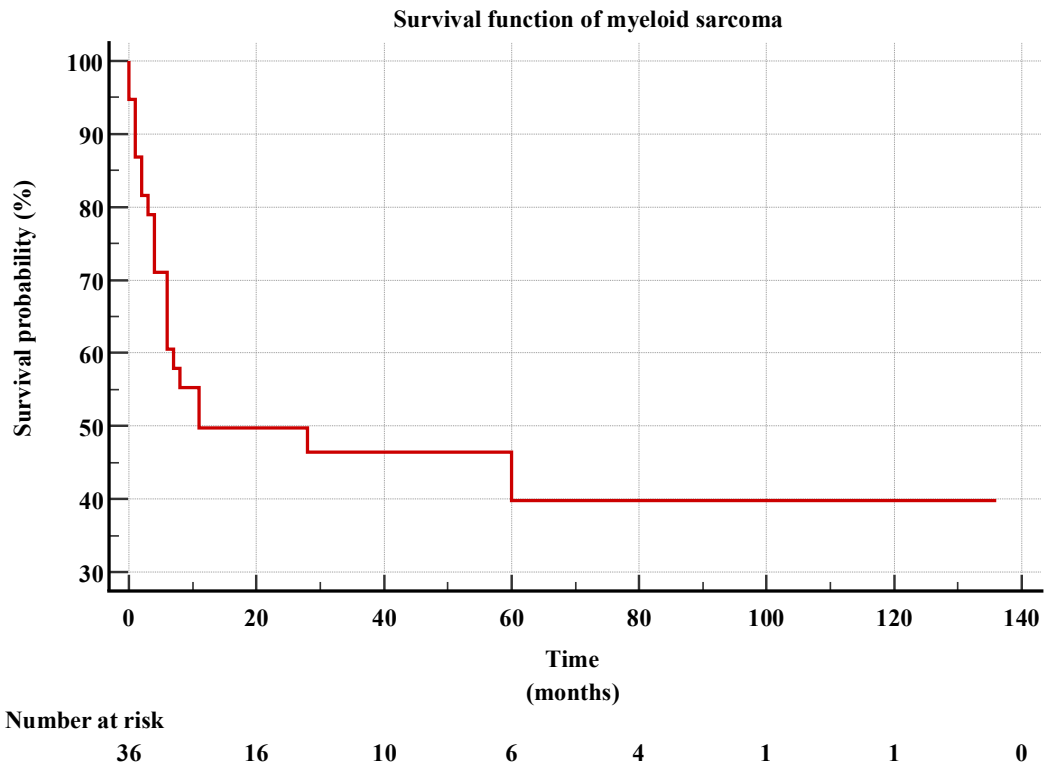

**Supplemental Figure 5** Kaplan-Meier survival analysis estimates free of mortality in myeloid sarcoma patients. At the time of diagnosis in the first month, two patients died, so at zero time, the number at risk started with 36 patients
